# Supplementary material for: Single-step preparation of zinco- and aluminosilicate delaminated MWW layers for the catalytic conversion of glucose
Source: Royal Society of Chemistry journal article supplement (doi:10.1039/d1gc02353e), 2021-01-01
Supplement: d1gc02353e1.pdf [file d1gc02353e1.pdf]

Electronic supplementary information

**Single-step preparation of zinco- and aluminosilicate delaminated MWW layers  
for catalytic conversion of glucose†**

Hyung-Ki Min,<sup>a</sup> Sungjoon Kweon,<sup>b</sup> Sohun Oh,<sup>c</sup> Hyejin An,<sup>b</sup> Yun Hye Cho,<sup>b</sup> Haehyun Min,<sup>d</sup>  
Donghui Jo,<sup>e</sup> Jeong F. Kim,<sup>b</sup> Chae-Ho Shin,<sup>c</sup> Sung Bong Kang\*<sup>d</sup> and Min Bum Park\*<sup>b</sup>

<sup>a</sup>*LOTTE Chemical Research Institute, Daejeon 34110, Korea*

<sup>b</sup>*Department of Energy and Chemical Engineering, Incheon National University, Incheon 22012, Korea. E-mail: mbpark@inu.ac.kr*

<sup>c</sup>*Department of Chemical Engineering, Chungbuk National University, Cheongju, Chungbuk 28644, Korea*

<sup>d</sup>*School of Earth Sciences and Environmental Engineering, Gwangju Institute of Science and Technology, Gwangju 61005, Korea. E-mail: sbkang@gist.ac.kr*

<sup>e</sup>*Petrochemical Catalyst Research Center, Korea Research Institute of Chemical Technology, Daejeon 34114, Korea*

†Electronic supplementary information (ESI) available. See DOI: xxx

**Table S1** Physicochemical properties of catalysts prepared in this study

| Catalyst <sup>a</sup>                          | BET surface area (m <sup>2</sup> g <sup>-1</sup> ) <sup>b</sup> |          |           | ICP elemental analysis |                        |                                         |       | Acid concentration (μmol g <sup>-1</sup> ) <sup>e</sup> |       |       |
|------------------------------------------------|-----------------------------------------------------------------|----------|-----------|------------------------|------------------------|-----------------------------------------|-------|---------------------------------------------------------|-------|-------|
|                                                | Total                                                           | External | Micropore | Si/B                   | Si/Zn <sub>Total</sub> | Si/Zn <sub>Framework</sub> <sup>d</sup> | Si/Al | Brønsted                                                | Lewis | Total |
| B-MWW                                          | 477                                                             | 25       | 452       | 9.5                    | -                      | -                                       | -     | 0                                                       | n.d.  | -     |
| Zn-DML-100                                     | 474                                                             | 112      | 362       | 21                     | 25                     | 25                                      | -     | 84                                                      | n.d.  | -     |
| Zn-DML-120                                     | 452                                                             | 142      | 310       | 25                     | 9.3                    | 16                                      | -     | 31                                                      | n.d.  | -     |
| Zn-DML-140                                     | 271                                                             | 173      | 98        | 49                     | 4.6                    | 12                                      | -     | 13                                                      | 178   | 191   |
| Zn-DML-160                                     | 165                                                             | 165      | 0         | 240                    | 3.5                    | 10                                      | -     | 0                                                       | 84    | 84    |
| Zn <sub>0.75</sub> Al <sub>0.25</sub> -DML-160 | 322                                                             | 105      | 217       | 1100                   | 190                    | 190                                     | 26    | 137                                                     | 240   | 377   |
| Zn <sub>0.50</sub> Al <sub>0.50</sub> -DML-160 | 427                                                             | 137      | 291       | 1100                   | 230                    | 230                                     | 8.4   | 153                                                     | 266   | 419   |
| Zn <sub>0.25</sub> Al <sub>0.75</sub> -DML-160 | 372                                                             | 68       | 304       | 1200                   | 410                    | 410                                     | 8.4   | 135                                                     | 172   | 307   |
| Al-DML-160                                     | 304                                                             | 66       | 238       | 6800                   | -                      | -                                       | 12    | 136                                                     | 143   | 279   |
| SnAl-BEA                                       | 527                                                             | 120      | 407       | -                      | 130 <sup>c</sup>       | -                                       | 620   | 8                                                       | 65    | 73    |

<sup>a</sup> Calcined at 550 °C for 8 h. <sup>b</sup> Calculated from N<sub>2</sub> sorption isotherms (Fig. S5†). <sup>c</sup> Si/Sn molar ratio. <sup>d</sup> Calculated under the assumption that the number of framework tetrahedral atoms is 72 including 65.2 Si atoms, which are same to those of B-MWW. <sup>e</sup> The concentrations of Brønsted and Lewis acid sites were determined from the intensities of the pyridine-adsorbed IR bands at approximately 1550 and 1450 cm<sup>-1</sup>, respectively (Figs. 6 and S6†). n.d. means that it cannot be determined due to the background spectrum.

**Table S2** Relative integrated areas of Zn  $2p_{3/2}$  XPS spectra of the Zn-containing catalysts employed in this study

| Catalyst                                       | Area (a.u.)                    |                       |                       | Area ratio<br>(A/B) |
|------------------------------------------------|--------------------------------|-----------------------|-----------------------|---------------------|
|                                                | Framework Zn<br>at 1023 eV (A) | ZnO<br>at 1022 eV (B) | Total area<br>(A + B) |                     |
| Zn-DML-100                                     | 4600                           | 2450                  | 7050                  | 1.88                |
| Zn-DML-120                                     | 14000                          | 8500                  | 22500                 | 1.65                |
| Zn-DML-140                                     | 12000                          | 17000                 | 29000                 | 0.71                |
| Zn-DML-160                                     | 7000                           | 27500                 | 34500                 | 0.25                |
| Zn <sub>0.75</sub> Al <sub>0.25</sub> -DML-160 | 17000                          | 18000                 | 35000                 | 0.94                |

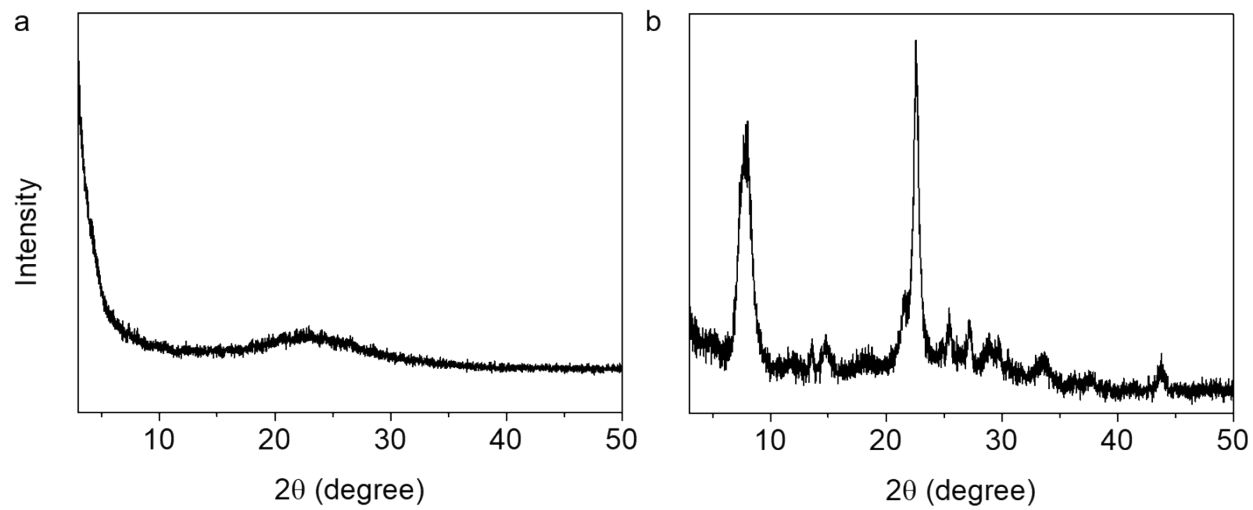

**Fig. S1** Powder XRD patterns of (a) delaminated B-MWW and (b) SnAl-BEA.

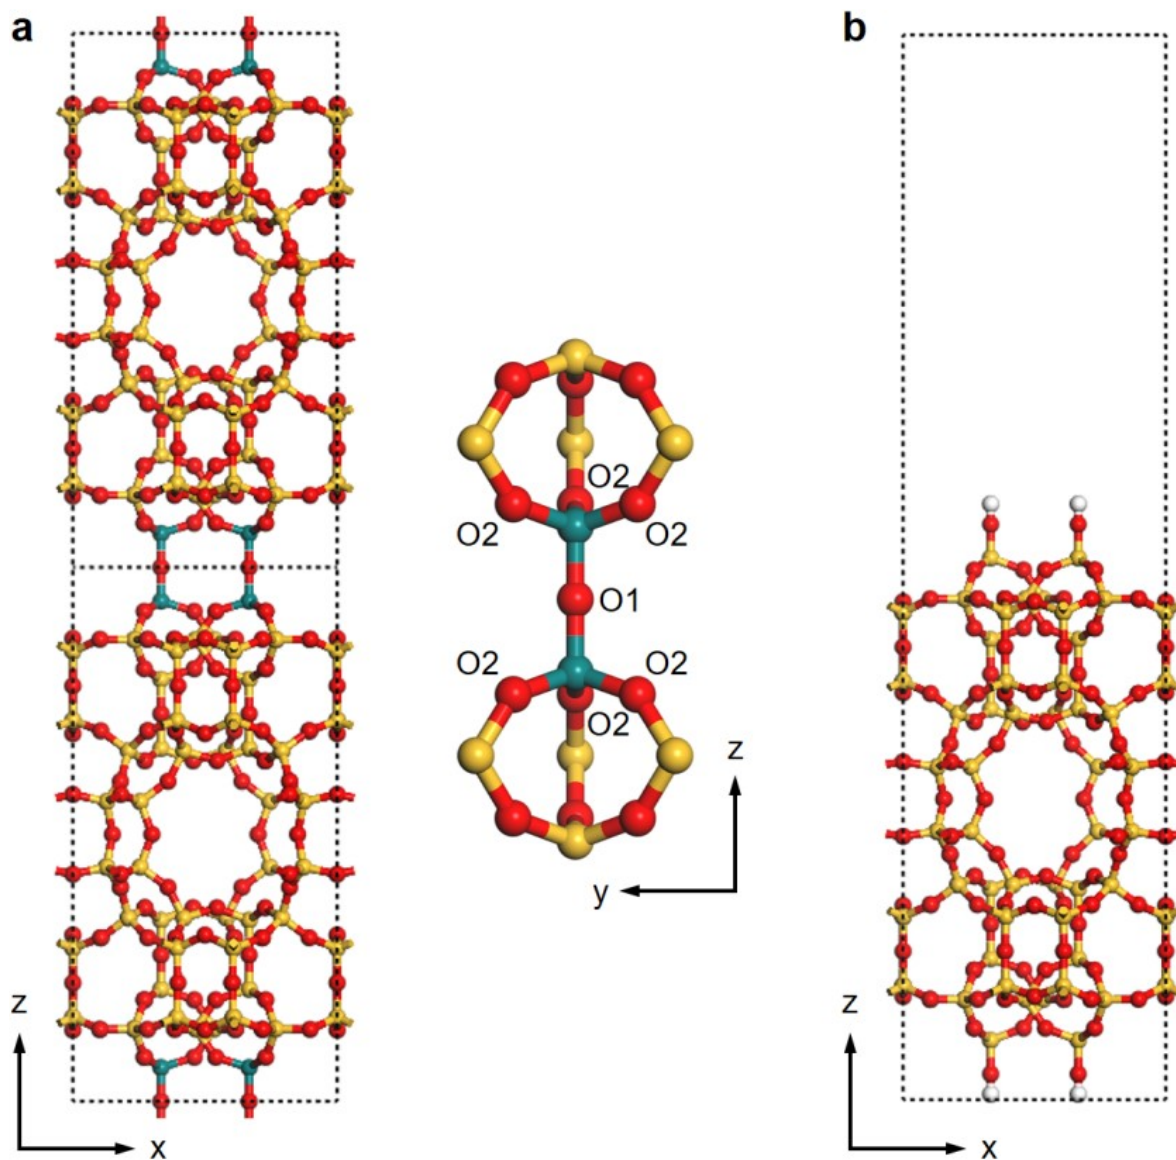

**Fig. S2** Initial structures of (a) 3D and (b) 2D MWW silicates for DFT calculation. Si, yellow; O, red; H, white. The Si1 atoms of 3D MWW structure, which are connected with O1 and O2 atoms, are marked in green.

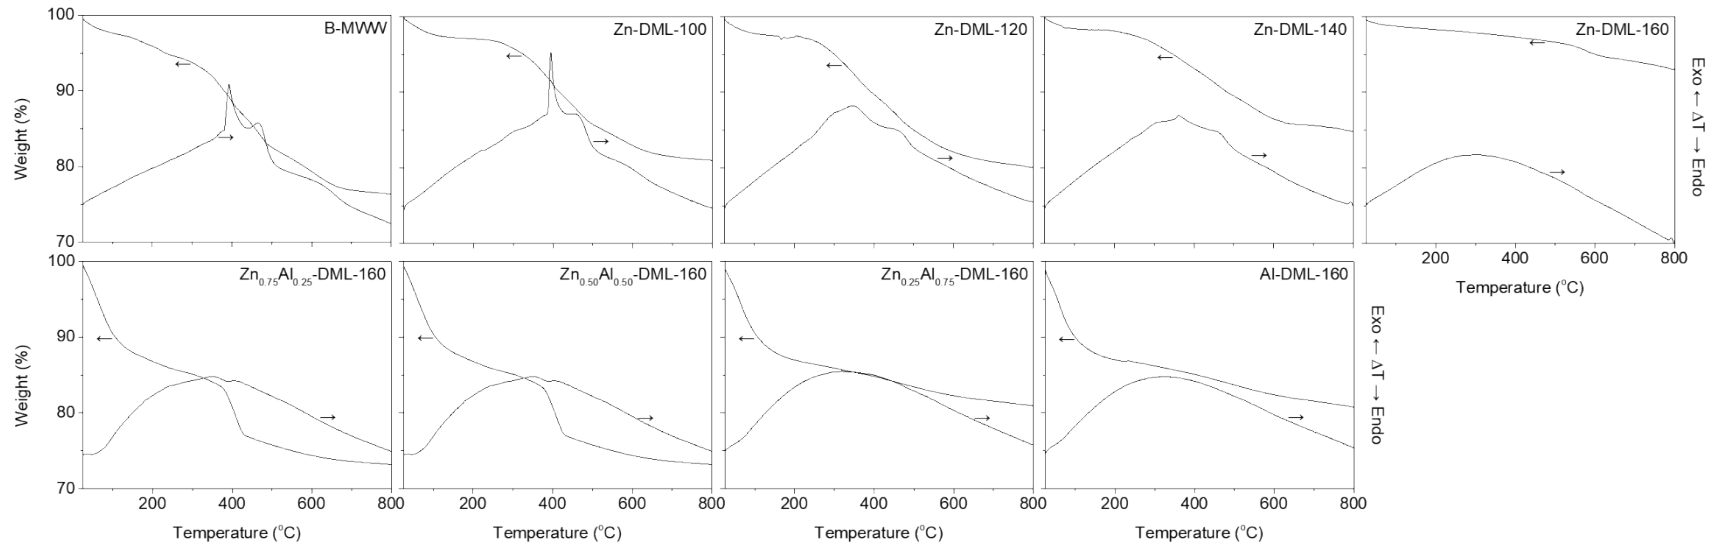

**Fig. S3** TGA/DTA curves for the as-synthesized B-MWW(P), Zn-DML- $x$ , and Zn <sub>$y$</sub> Al <sub>$z$</sub> -DML-160 samples.

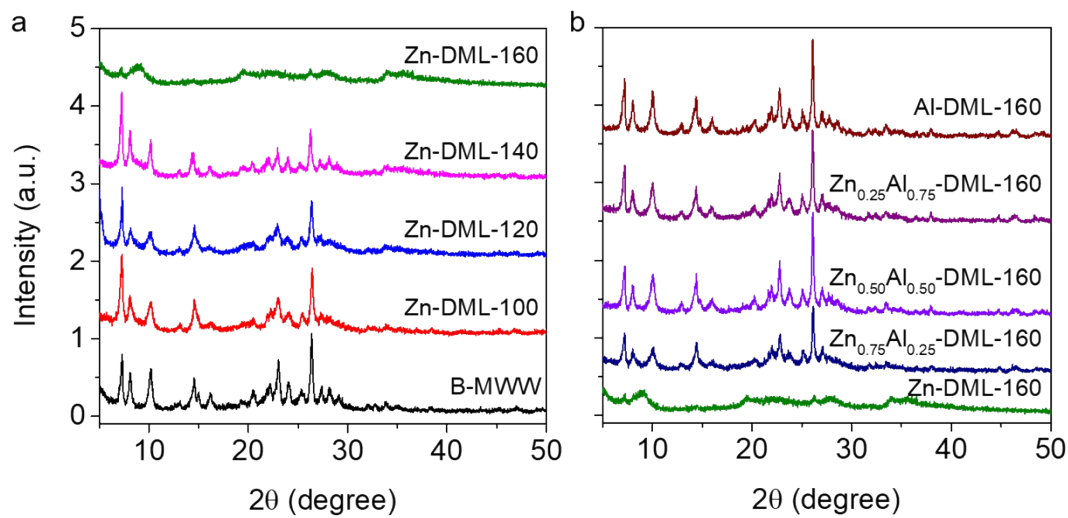

**Fig. S4** Powder XRD patterns of calcined (a) B-MWW and Zn-DML- $x$  and (b) Zn $_y$ Al $_z$ -DML-160 catalysts.

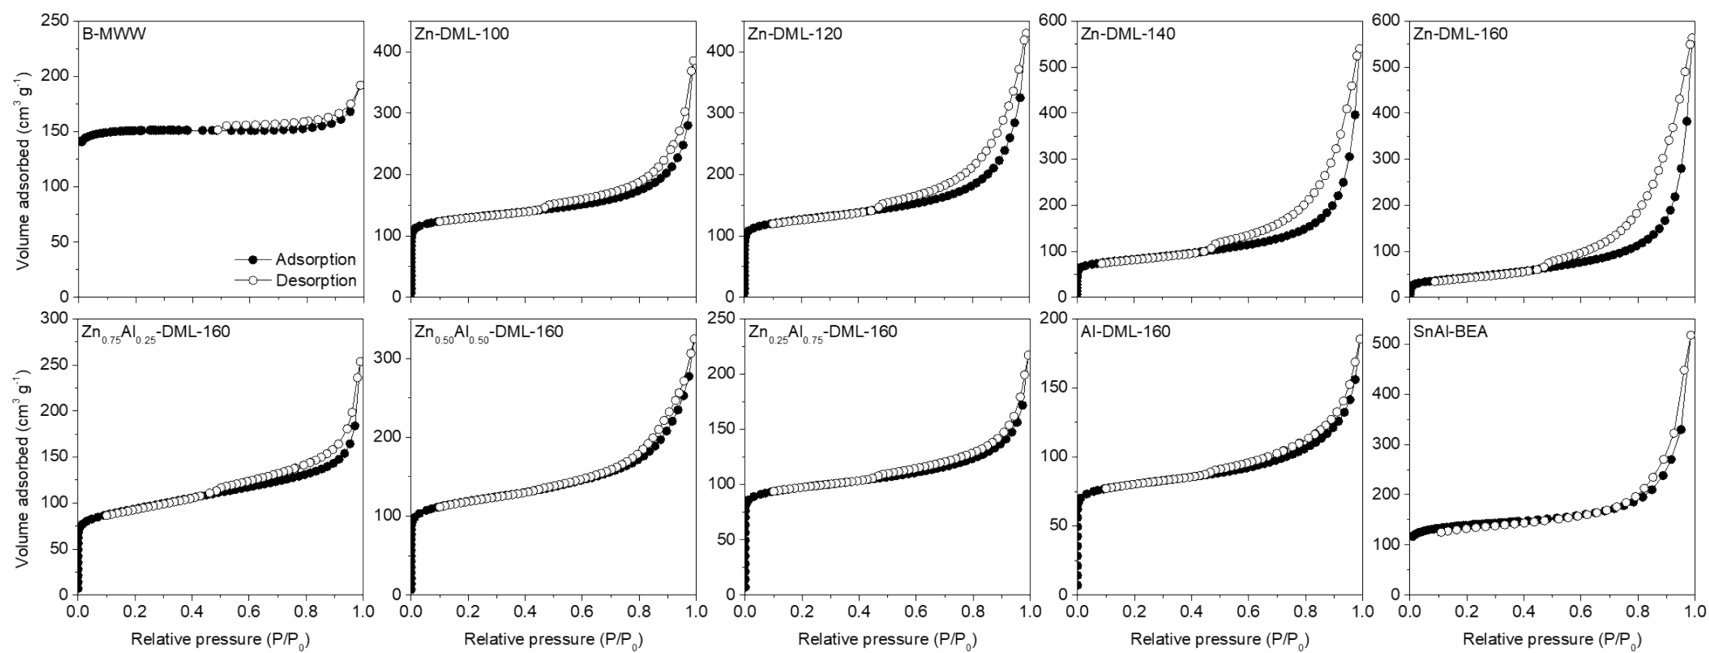

**Fig. S5** N<sub>2</sub> sorption isotherms of calcined B-MWW, Zn-DML-*x*, Zn<sub>*y*</sub>Al<sub>*z*</sub>-DML-160, and SnAl-BEA catalysts.



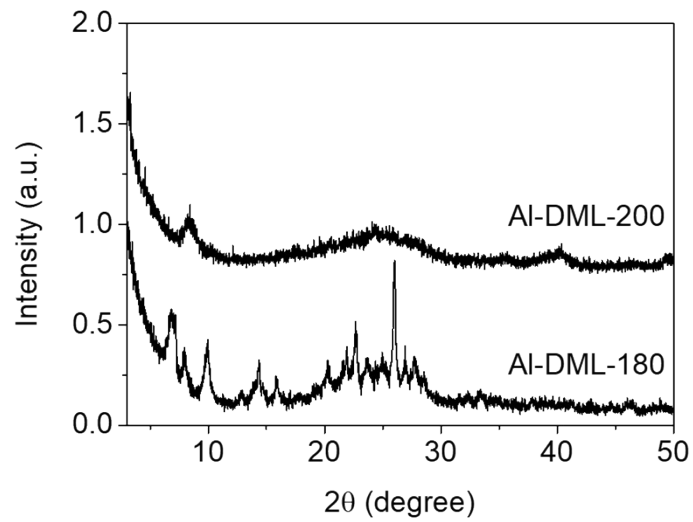

**Fig. S6** Powder XRD patterns of as-synthesized Al-DML-180 and Al-DML-200 samples.

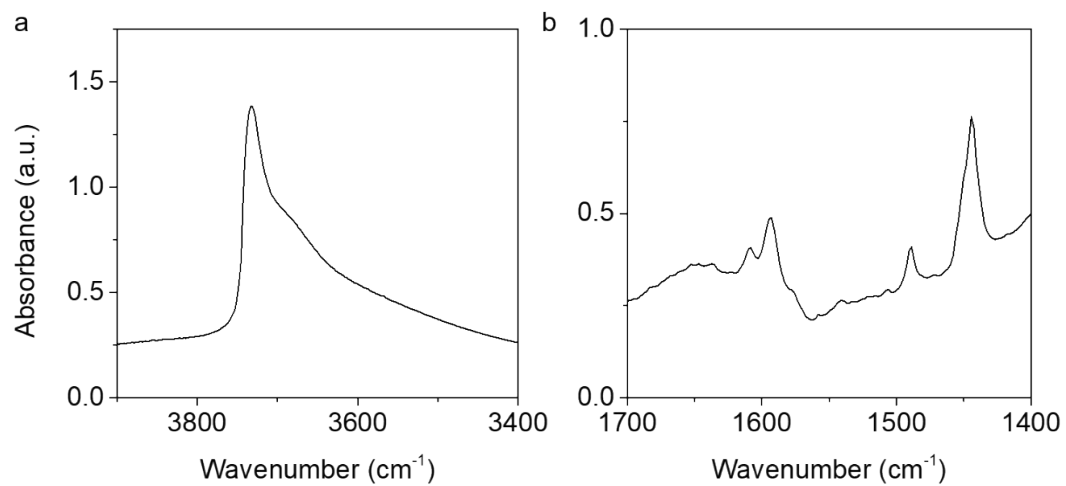

**Fig. S7** (a) IR spectrum in the 3400–3900 region and (b) pyridine-adsorbed IR spectrum of SnAl-BEA.

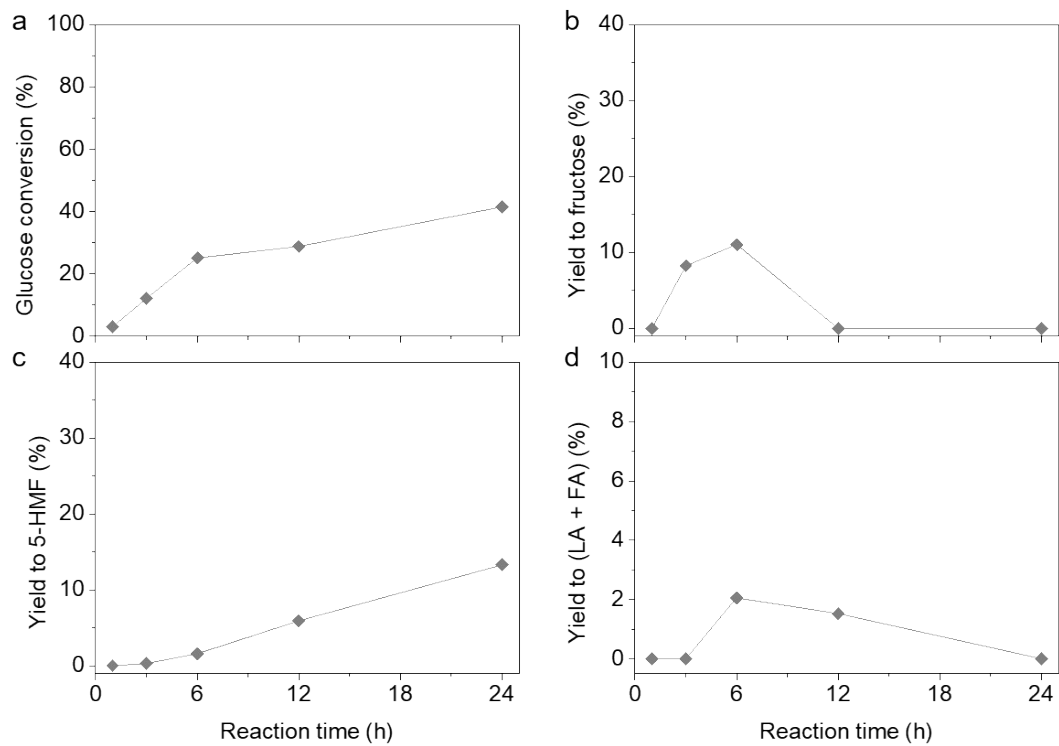

**Fig. S8** (a) Glucose conversion and yields for (b) fructose, (c) HMF, and (d) LA + FA with no catalyst at 160 °C.

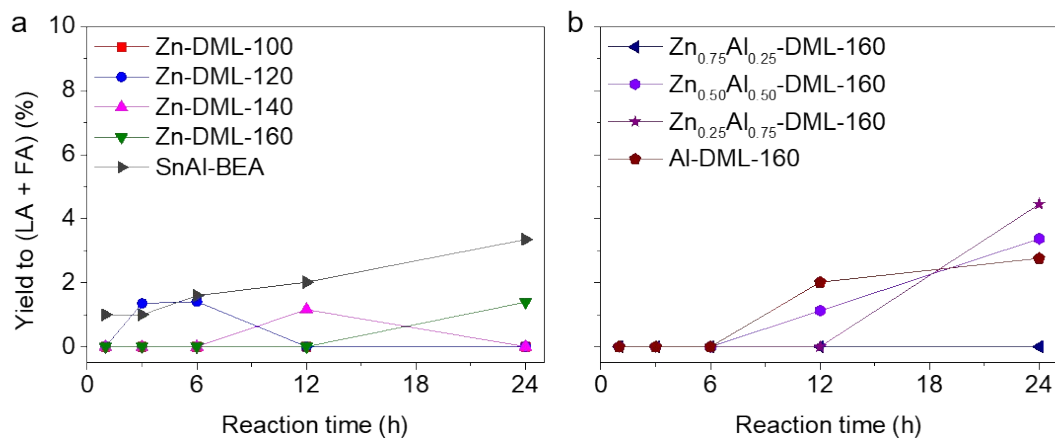

**Fig. S9** Yields for LA + FA over (a) Zn-DML-*x* and SnAl-BEA and (b) Zn<sub>*y*</sub>Al<sub>2-*y*</sub>-DML-160 catalysts at 160 °C.
